# Supplementary material
Source: PubMed Central journal article supplement (PMC4214681)
Supplement: NIHMS614933-supplement-2.pdf [file NIHMS614933-supplement-2.pdf]

**Table S1:**

|              |                | Wake         |                       | SWS          |                       | REM sleep    |                       |
|--------------|----------------|--------------|-----------------------|--------------|-----------------------|--------------|-----------------------|
|              |                | Control mice | M3 expressing PZ mice | Control mice | M3 expressing PZ mice | Control mice | M3 expressing PZ mice |
| <b>Light</b> | % of time      | 36.3±1.4     | 36.2±1.4              | 56.5±1.4     | 56.0±1.4              | 6.3±0.3      | 6.3±0.4               |
|              | Number         | 130.9±7.8    | 122.8±10.0            | 134.1±7.7    | 127.2±10.2            | 47.3±2.0     | 48.7±4.4              |
|              | Duration (sec) | 121.8±7.1    | 126.7±10.2            | 193.7±12.4   | 212.8±17.1            | 59.9±2.5     | 60.8±2.4              |
| <b>Dark</b>  | % of time      | 57.2±2.4     | 52.9±1.9              | 39.1±2.3     | 43.1±1.7              | 3.6±0.4      | 4.0±0.3               |
|              | Number         | 87.6±6.5     | 91.8±7.2              | 88.2±6.8     | 92.5±7.3              | 26.4±2.6     | 27.4±2.6              |
|              | Duration (sec) | 315.9±34.2   | 282.8±25.1            | 198.4±12.2   | 210.0±13.5            | 61.4±3.3     | 63.2±3.6              |

**Supplementary Table 1:** Percentage, number of bouts and mean ( $\pm$  SEM) bout duration (sec) of spontaneous sleep-wake state (Wake, SWS and REM sleep) in mice expressing the hM3Dq receptor in GABAergic PZ neurons ( $n = 13$ ) as compared with non-cre-expressing littermate mice ( $n = 13$ ). Averages are given for the 12-hour light period and the 12-hour dark period. No significant differences were found using a mixed model ANOVA. A mixed factorial ANOVA using the between-subjects factor of hM3Dq expression (control and PZ hM3Dq expressing mice) and the within-subjects factors of time of day (light and dark periods) and sleep-wake stage (W, SWS and REM sleep) was used to analyze the percentage(s) of time spent in W, SWS and REM sleep, as well as the frequency and average bout durations of each stage during the light and dark periods.

**Table S2:**

|                                                                               |                     |                | Wake                 |                         | SWS        |                         | REM sleep  |                         |
|-------------------------------------------------------------------------------|---------------------|----------------|----------------------|-------------------------|------------|-------------------------|------------|-------------------------|
|                                                                               |                     |                | Vehicle              | CNO                     | Vehicle    | CNO                     | Vehicle    | CNO                     |
| <b>Control mice<br/>Injection at 7<br/>P.M.<br/>N = 12</b>                    | <b>Time</b>         | Latency (min)  |                      |                         | 42.3±16.1  | 61.5±22                 | 110.1±19.3 | 117.9±19.4              |
|                                                                               | <b>19-22</b>        | % of time      | 67.3±4.5             | 62.0±6.1                | 31.3±4.2   | 36.4±5.9                | 1.4±0.4    | 1.6±0.5                 |
|                                                                               |                     | Number         | 23.0±3.8             | 16.6±3.1                | 22.5±3.7   | 16.1±3.3                | 3.2±0.9    | 3.3±0.9                 |
|                                                                               |                     | Duration (min) | 23.4±17.2            | 43.3±24.6               | 2.6±0.3    | 3.9±0.7                 | 0.7±0.2    | 0.9±0.2                 |
|                                                                               | <b>22-1</b>         | % of time      | 58.5±3.3             | 55.3±2.3                | 38.9±3.1   | 42.2±2.3                | 2.6±0.3    | 2.5±0.5                 |
|                                                                               |                     | Number         | 22.7±2.0             | 21.0±2.3                | 22.7±2.2   | 21.8±2.4                | 5.1±0.6    | 4.8±0.9                 |
| Duration (min)                                                                |                     | 5.4±0.7        | 4.9±0.7              | 3.2±0.3                 | 3.8±0.3    | 1.0±0.1                 | 1.1±0.2    |                         |
| <b>M3-<br/>expressing<br/>PZ mice<br/>Injection at 7<br/>P.M.<br/>N = 13</b>  |                     | Latency (min)  |                      |                         | 30.5±6.4   | 6.4±0.5 <sup>B</sup>    | 72.1±11.7  | 640.8±72.3 <sup>C</sup> |
|                                                                               | <b>19-22</b>        | % of time      | 61.0±3.4             | 19.2±3.1 <sup>C</sup>   | 36.6±2.9   | 80.7±3.1 <sup>C</sup>   | 2.5±0.6    | 0.0±0.0 <sup>C</sup>    |
|                                                                               |                     | Number         | 24.1±2.2             | 32.8±4.4                | 24.0±2.4   | 32.4±4.4                | 5.7±1.5    | 0.1±0.1 <sup>B</sup>    |
|                                                                               |                     | Duration (min) | 5.9±1.1              | 1.1±0.1                 | 3.0±0.3    | 6.3±1.3 <sup>C</sup>    | 0.8±0.1    | 0.1±0.1 <sup>C</sup>    |
|                                                                               | <b>22-1</b>         | % of time      | 55.2±3.5             | 62.8±7.7                | 41.5±3.1   | 37.2±7.7                | 3.2±0.5    | 0.0±0.0 <sup>C</sup>    |
|                                                                               |                     | Number         | 25.1±2.3             | 36.4±6.8                | 25.4±2.4   | 36.3±6.7                | 5.7±0.9    | 0.1±0.1 <sup>C</sup>    |
|                                                                               |                     | Duration (min) | 4.5±0.8              | 8.2±3.5                 | 3.2±0.2    | 2.0±0.3                 | 1.1±0.1    | 0.0±0.0 <sup>C</sup>    |
|                                                                               | <b>1-7</b>          | % of time      | 46.1±2.1             | 59.6±6.0                | 49.2±1.9   | 38.4±5.6                | 4.8±0.4    | 1.4±0.4 <sup>C</sup>    |
|                                                                               |                     | Number         | 50.3±3.8             | 44.6±5.9                | 51.5±3.8   | 45.3±6.0                | 16.2±2.1   | 8.5±2.3 <sup>A</sup>    |
|                                                                               |                     | Duration (min) | 3.9±0.6              | 10.2±4.4                | 3.3±0.3    | 3.0±0.5                 | 1.1±0.1    | 0.8±0.1 <sup>A</sup>    |
|                                                                               | <b>7-19</b>         | % of time      | 36.5±1.9             | 36.8±2.6                | 57.2±1.8   | 57.1±2.2                | 6.2±0.4    | 5.6±0.8                 |
|                                                                               |                     | Number         | 120.2±9.9            | 85.5±5.1 <sup>C</sup>   | 124.4±10.3 | 88.0±5.2 <sup>C</sup>   | 48.0±5.5   | 36.1±5.1 <sup>B</sup>   |
|                                                                               |                     | Duration (min) | 2.2±0.2              | 3.0±0.3                 | 3.6±0.3    | 4.8±0.3                 | 1.0±0.0    | 1.1±0.1                 |
|                                                                               | <b>D+1<br/>19-7</b> | % of time      | 52.6±2.4             | 53.8±2.6                | 43.6±2.1   | 43.3±2.2                | 3.8±0.4    | 3.7±0.6                 |
|                                                                               |                     | Number         | 88.8±6.3             | 116.1±12.0 <sup>B</sup> | 89.6±6.6   | 118.8±12.8 <sup>B</sup> | 27.0±3.3   | 37.3±7.4 <sup>A</sup>   |
| Duration (min)                                                                |                     | 4.8±0.5        | 3.2±0.5 <sup>A</sup> | 3.6±0.2                 | 3.3±0.2    | 1.0±0.1                 | 1.1±0.1    |                         |
| <b>M3-<br/>expressing<br/>PZ mice<br/>Injection at<br/>10 A.M.<br/>N = 13</b> |                     | Latency (min)  |                      |                         | 32.2±6.9   | 6.3±0.6 <sup>C</sup>    | 76.7±15.3  | 329.6±38.2 <sup>B</sup> |
|                                                                               | <b>10-13</b>        | % of time      | 42.8±3.6             | 12.7±1.4 <sup>C</sup>   | 51.9±3.2   | 87.3±1.4 <sup>C</sup>   | 5.4±0.6    | 0.1±0.1 <sup>C</sup>    |
|                                                                               |                     | Number         | 32.3±4.3             | 21.2±3.3                | 32.6±4.4   | 21.0±3.3                | 9.5±1.6    | 0.1±0.1 <sup>C</sup>    |
|                                                                               |                     | Duration (min) | 4.0±1.6              | 1.4±0.2                 | 3.7±0.6    | 15.0±6.5                | 1.2±0.1    | 0.1±0.1 <sup>C</sup>    |
|                                                                               | <b>13-16</b>        | % of time      | 30.6±2.3             | 39.6±5.2                | 61.7±2.2   | 58.7±5.0                | 7.7±0.6    | 1.7±0.7 <sup>C</sup>    |
|                                                                               |                     | Number         | 34.9±2.6             | 34.9±2.9                | 36.2±2.6   | 34.8±2.9                | 15.9±1.7   | 2.2±0.8 <sup>C</sup>    |
|                                                                               |                     | Duration (min) | 1.6±0.2              | 2.4±0.5                 | 3.3±0.3    | 3.3±0.4                 | 0.9±0.1    | 0.8±0.2                 |
|                                                                               | <b>16-19</b>        | % of time      | 37.5±2.0             | 39.9±3.7                | 55.2±2.1   | 57.0±3.5                | 7.3±0.7    | 3.0±0.7                 |
|                                                                               |                     | Number         | 39.2±7.1             | 32.2±3.3                | 39.8±7.0   | 32.5±3.3                | 14.2±2.3   | 5.0±1.4                 |
|                                                                               |                     | Duration (min) | 2.0±0.2              | 2.6±0.3                 | 3.1±0.2    | 3.4±0.3                 | 1.1±0.1    | 1.1±0.1                 |
|                                                                               | <b>19-7</b>         | % of time      | 52.5±2.1             | 56.9±2.6                | 43.8±1.8   | 39.4±2.2                | 3.7±0.4    | 3.7±0.5                 |
|                                                                               |                     | Number         | 102.7±5.4            | 92.7±6.0                | 103.1±5.4  | 93.9±6.0                | 25.8±3.1   | 22.5±3.3                |
| Duration (min)                                                                |                     | 3.9±0.3        | 4.8±0.5              | 3.1±0.1                 | 3.1±0.2    | 1.0±0.1                 | 1.3±0.1    |                         |

**Supplementary Table 2:** Sleep latencies, percentage, number of bouts and mean ( $\pm$  SEM) bout duration (sec) of spontaneous sleep-wake state (Wake, SWS and REM sleep) in non-hM3Dq-expressing mice ( $n = 12$ ) and hM3Dq-expressing mice ( $n = 13$ ), following CNO (0.3 mg/kg) or vehicle injections. A mixed factorial ANOVA using the between-subjects factor of injection (vehicle and CNO) and the within-subjects factors of time of day (analyzed periods) and sleep-wake stage (W, SWS and REM sleep) was used to analyze the percentages of time spent in W, SWS and REM sleep, as well as the frequency and average bout durations of each stage during the light and dark periods. <sup>A</sup>  $p < 0.05$ , <sup>B</sup>  $p < 0.01$  and <sup>C</sup>  $p < 0.001$ .
